# Supplementary material for: Chitosan Grafted Poly (Ethylene Glycol) Methyl Ether Acrylate Particulate Hydrogels for Drug Delivery Applications
Source: MDPI journal article supplement (doi:10.3390/gels8080494), 2022-08-09
Supplement: s1 [file s1]

# Chitosan grafted poly(ethylene glycol) methyl ether acrylate submicronic pH sensitive hydrogels for drug delivery applications

Corina-Lenuța Savin (Logigan)<sup>1,2</sup>, Christelle Delaite<sup>2</sup>, Crina Tiron<sup>3</sup>, Cristian Peptu<sup>4</sup>, Marcel Popa<sup>1,5,6</sup>, Catalina Anișoara Peptu<sup>1,\*</sup>

1 Department of Natural and Synthetic Polymers, Faculty of Chemical Engineering and Environmental Protection "Cristofor Simionescu", "Gheorghe Asachi" Technical University of Iasi, Romania, savincorina@yahoo.com, marpopa@ch.tuiasi.ro, catipeptu@ch.tuiasi.ro

2 Laboratory of Photochemistry and Macromolecular Engineering Institute J.B. Donnet, University of Haute Alsace, Mulhouse, France, christelle.delaite@uha.fr

3 Regional Institute of Oncology, 2-4, General Henri Mathias Berthelot Street, 700483 Iasi, Romania; crinatiron2003@yahoo.com

4 "Petru Poni" Institute of Macromolecular Chemistry, Aleea Grigore Ghica Voda, 41A, 700487 Iasi, Romania, cristian\_peptu@yahoo.com

5 "Apollonia" University of Iasi, Faculty of Medical Dentistry, Muzicii Street, No. 2, Iasi 700511, Romania

6 Academy of Romanian Scientists, Splaiul Independentei Street, No 54, 050094 Bucharest, Romania

\* Correspondence: catipeptu@ch.tuiasi.ro (Peptu C.A.)

## Contents

|                                                                                                             |                  |               |
|-------------------------------------------------------------------------------------------------------------|------------------|---------------|
| 1. Characteristic absorption bands of CS, PEGA, CS-PEGA                                                     | <b>Table S1</b>  | <b>Page 2</b> |
| 2. CPH characteristic absorption bands                                                                      | <b>Table S2</b>  | <b>Page 2</b> |
| 3. TGA analysis of chitosan particulate hydrogels (A8, A9, A10 samples)                                     | <b>Figure S1</b> | <b>Page 2</b> |
| 4. Kinetics of the LEV loading into the ABS from chitosan particulate hydrogels (A8, A9 samples)            | <b>Figure S2</b> | <b>Page 3</b> |
| 5. Kinetics of the LEV release efficiency into the PBS from chitosan particulate hydrogels (A8, A9 samples) | <b>Figure S3</b> | <b>Page 4</b> |
| 6. Korsmeyer-Peppas model for A8, 9 samples                                                                 | <b>Figure S4</b> | <b>Page 5</b> |
| 7. n and k values obtained based on the Korsmeyer-Peppas model (0 – 480 min)                                | <b>Table S3</b>  | <b>Page 5</b> |
| 8. Viability of HDMVEC and MCF-10A cells for submi chitosan particulate hydrogels (sample A9)               | <b>Figure S5</b> | <b>Page 5</b> |

**Table S1.** Characteristic absorption bands of CS, PEGA, CS-PEGA

| Compound | Wavelength<br>(cm <sup>-1</sup> ) | Absorption band                                                                                                  |
|----------|-----------------------------------|------------------------------------------------------------------------------------------------------------------|
| Chitosan | 1076                              | Stretching vibrations of -C-O-C                                                                                  |
|          | 1379,1423,1659                    | Specific signals for deformation vibrations of acetylated amine (NHAc) (amide I, -NH <sub>2</sub> and amide III) |
|          | 2879                              | The vibration of CH groups                                                                                       |
|          | 3355                              | Axial stretching vibrations of OH and NH <sub>2</sub> groups                                                     |
| PEGA     | 1105                              | Stretching vibrations -C-O-C                                                                                     |
|          | 1724                              | The vibration signal corresponding to the C = O bonds                                                            |
|          | 2874                              | The vibration of CH groups                                                                                       |
|          | 3522                              | Axial stretching vibrations of OH groups                                                                         |
| CS-PEGA  | 1083                              | Stretching vibrations -C-O-C                                                                                     |
|          | 1379, 1566,1649                   | Specific signals for deformation vibrations of acetylated amine groups                                           |
|          | 1733                              | The vibration signal corresponding to the C = O bonds                                                            |
|          | 2880                              | The vibration of CH groups                                                                                       |
|          | 3470                              | Axial stretching vibrations of secondary amine groups                                                            |

**Table S2.** CPH characteristic absorption bands

| Compound | Wavelength<br>(cm <sup>-1</sup> ) | Absorption band                                                                                                                                                                                                               |
|----------|-----------------------------------|-------------------------------------------------------------------------------------------------------------------------------------------------------------------------------------------------------------------------------|
| A8       |                                   | The absorption band signal corresponding to the new bonds formed by the ionic crosslinking process between P <sub>3</sub> O <sub>10</sub> <sup>5-</sup> anions from TPP and NH <sub>3</sub> <sup>+</sup> cations from CS-PEGA |
|          | 846                               |                                                                                                                                                                                                                               |
|          | 1074                              | Characteristic stretching vibrations -C-O-C                                                                                                                                                                                   |
|          | 1315                              | Band-specific bonding signal P = O                                                                                                                                                                                            |
|          | 1573                              | Signals specific to imine linkages -C=N-                                                                                                                                                                                      |

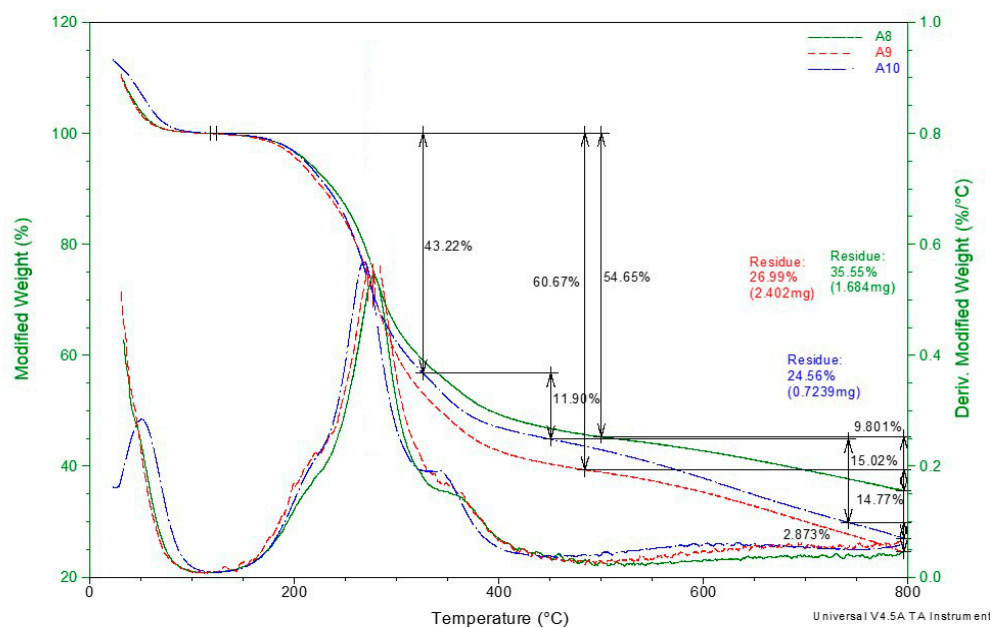

**Figure S1.** TGA analysis of chitosan particulate hydrogels (A8, A9, A10 samples)

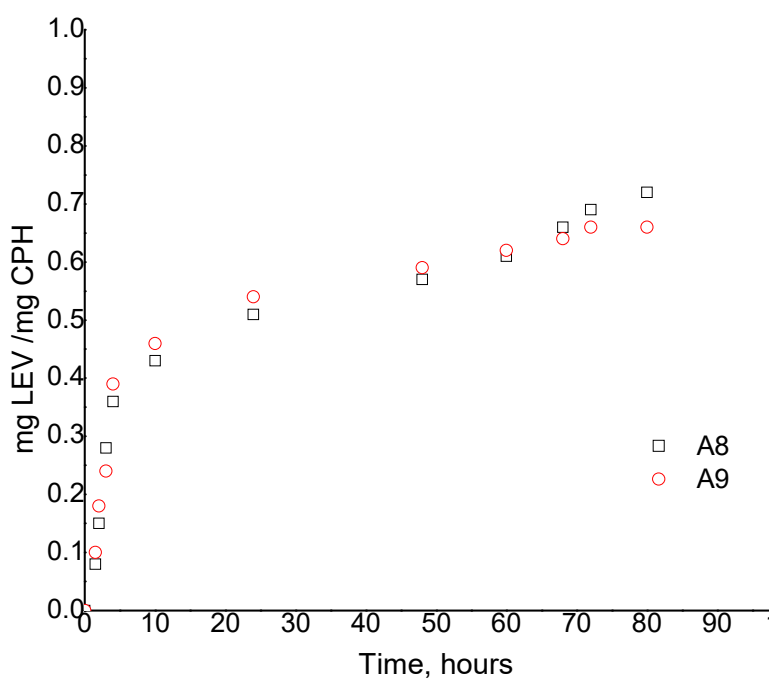

**Figure S2.** Kinetics of the LEV loading into the ABS from chitosan particulate hydrogels ( A8 - A9 samples)

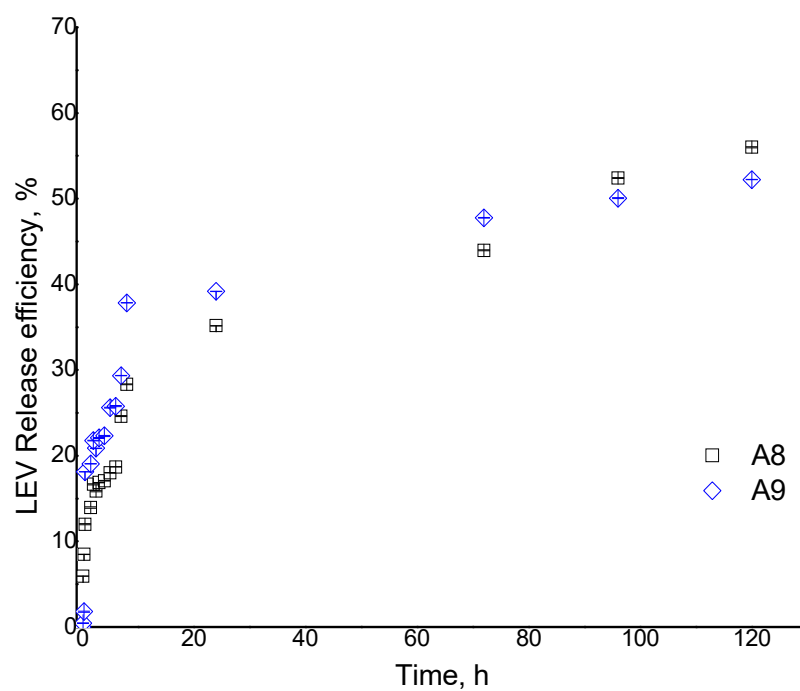

**Figure S3.** Kinetics of the LEV release efficiency into the PBS from chitosan particulate hydrogels ( A8 - A9 samples)

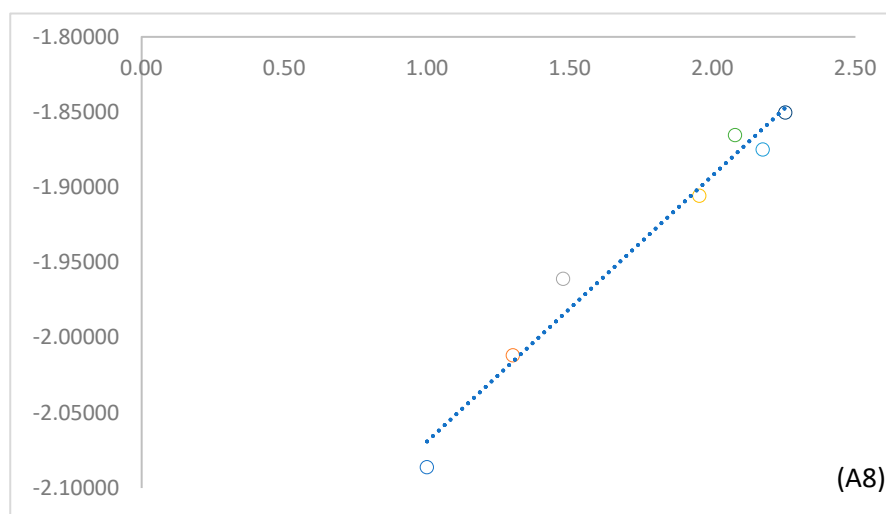

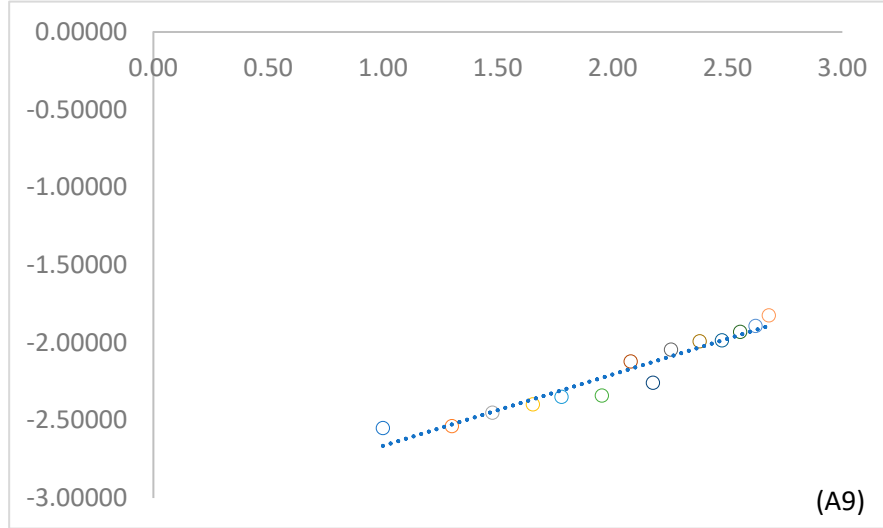

**Figure S4.** Korsmeyer-Peppas model for samples A8-A9

**Table S3.**  $n$  and  $k$  values obtained based on the Korsmeyer-Peppas model (0 – 480 min)

| Sample code | Equations                     | $k$    | $n$    | $R^2$  |
|-------------|-------------------------------|--------|--------|--------|
| A5          | $y = 0.4593 \cdot x - 3.1908$ | 0.1306 | 0.4593 | 0.9277 |
| A6          | $y = 0.4517 \cdot x - 3.3124$ | 0.1327 | 0.4517 | 0.9664 |
| A7          | $y = 0.4018 \cdot x - 3.1908$ | 0.1726 | 0.4218 | 0.9318 |
| A8          | $y = 0.4294 \cdot x - 3.351$  | 0.4214 | 0.4294 | 0.9778 |
| A9          | $y = 0.4176 \cdot x - 2.2459$ | 0.2433 | 0.4176 | 0.9230 |
| A10         | $y = 0.4228 \cdot x - 2.2956$ | 0.1575 | 0.4228 | 0.9314 |
| A11         | $y = 0.6035 \cdot x - 31561$  | 0.0319 | 0.6035 | 0.9378 |

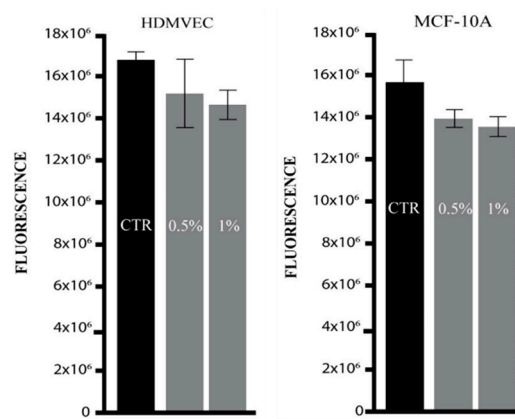

**Figure S5.** Viability of HDMVEC and MCF-10A cells for chitosan particulate hydrogels ( sample A9)
